# Supplementary material
Source: publisher figshare collection journal article supplement (https://acs.figshare.com/ndownloader/files/8879626)
Supplement: Supplementary file 1 [file 8879626]

## Supporting Information

# A *Twisting* Ring Polymer: Synthesis and Thermally Induced Chiroptical Responses of a Cyclic Poly(tetrahydrofuran) Having Axially Chiral Units

*Satoshi Honda,<sup>†</sup> Kaoru Adachi,<sup>‡</sup> Takuya Yamamoto<sup>§</sup> and Yasuyuki Tezuka<sup>||\*</sup>*

*<sup>†</sup>Department of Basic Science, Graduate School of Arts and Sciences, The University of Tokyo, 3-8-1 Komaba, Meguro-ku, Tokyo 153-8902, Japan.*

*<sup>‡</sup>Department of Chemistry and Materials Technology, Kyoto Institute of Technology, Matsugasaki, Sakyo-ku, Kyoto 606-8585, Japan*

*<sup>§</sup>Division of Applied Chemistry, Faculty of Engineering, Hokkaido University, Sapporo, Hokkaido 060-8628, Japan*

*<sup>||</sup>Department of Organic and Polymeric Materials, Tokyo Institute of Technology, O-okayama, Meguro-ku, Tokyo 152-8552, Japan*

*\*E-mail: ytezuka@o.cc.titech.ac.jp*

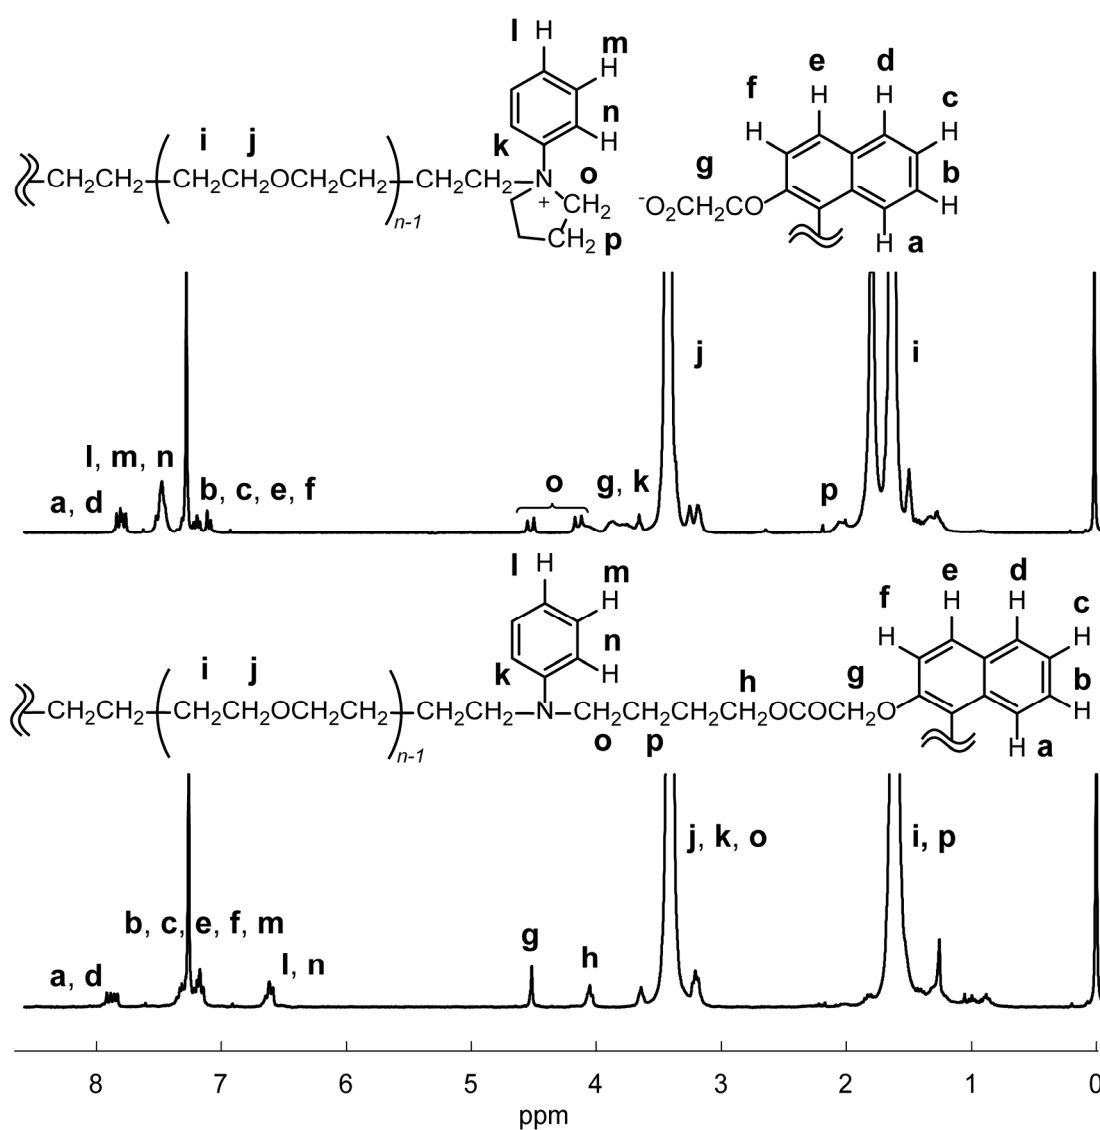

**Figure S1.** 300 MHz  $^1\text{H}$  NMR spectra of (top) **2/1<sub>R</sub>** and (bottom) **C<sub>R-1</sub>**. ( $\text{CDCl}_3$ , 25 °C)

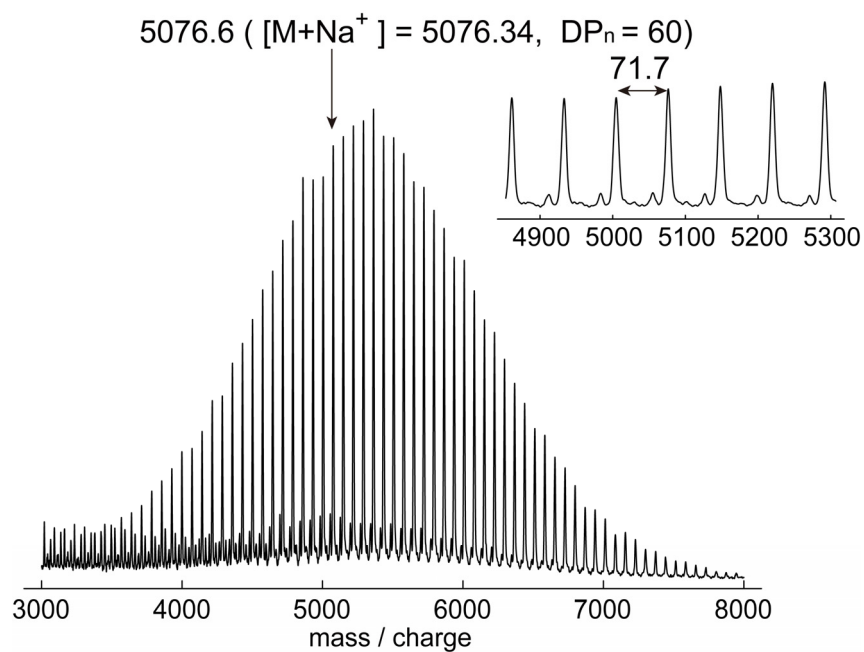

**Figure S2.** A MALDI-TOF mass spectrum of  $C_{R-1}$ . (Linear mode, matrix: dithranol with sodium trifluoroacetate.  $DP_n$  denotes the number of monomer units in the product.)

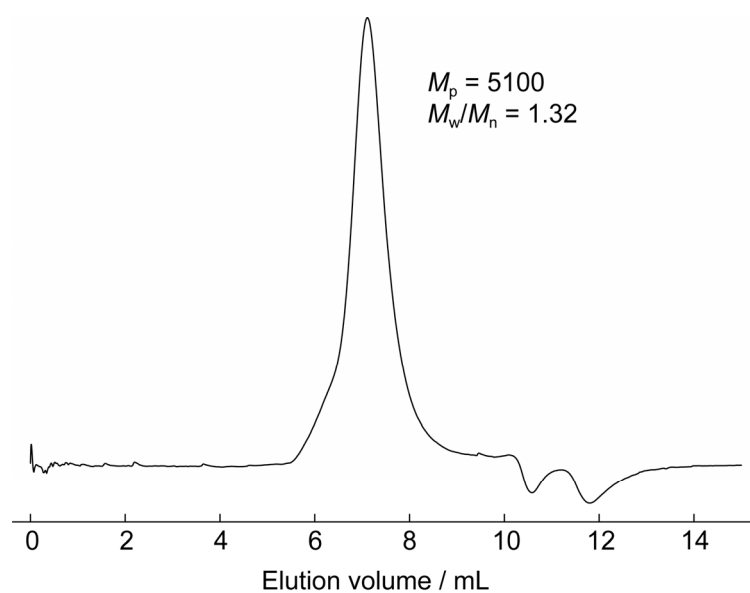

**Figure S3.** A SEC trace of **CR-1**. The observed minor shoulder peak at the higher molecular weight direction in cyclic poly(THF) is assignable to the product formed by the intermolecular chain-extension reaction. (THF as an eluent, 1.0 mL/min.)

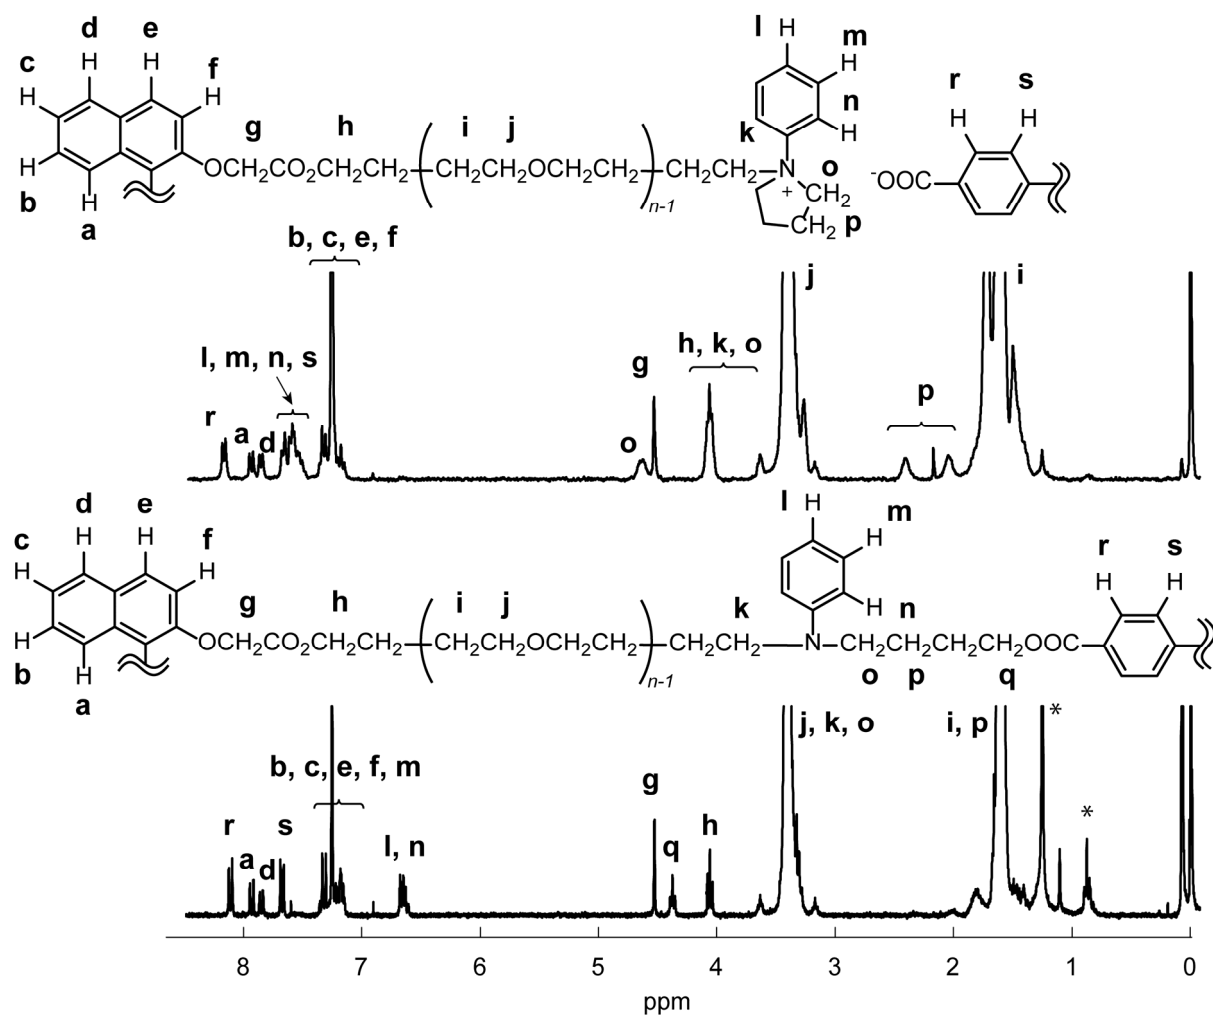

**Figure S4.** 300 MHz <sup>1</sup>H NMR spectra of (top) 3<sub>R</sub>/BiPh and (bottom) C<sub>R-2</sub>. (CDCl<sub>3</sub>, 25 °C; the signal with \* is due to hexane in the mixture.)

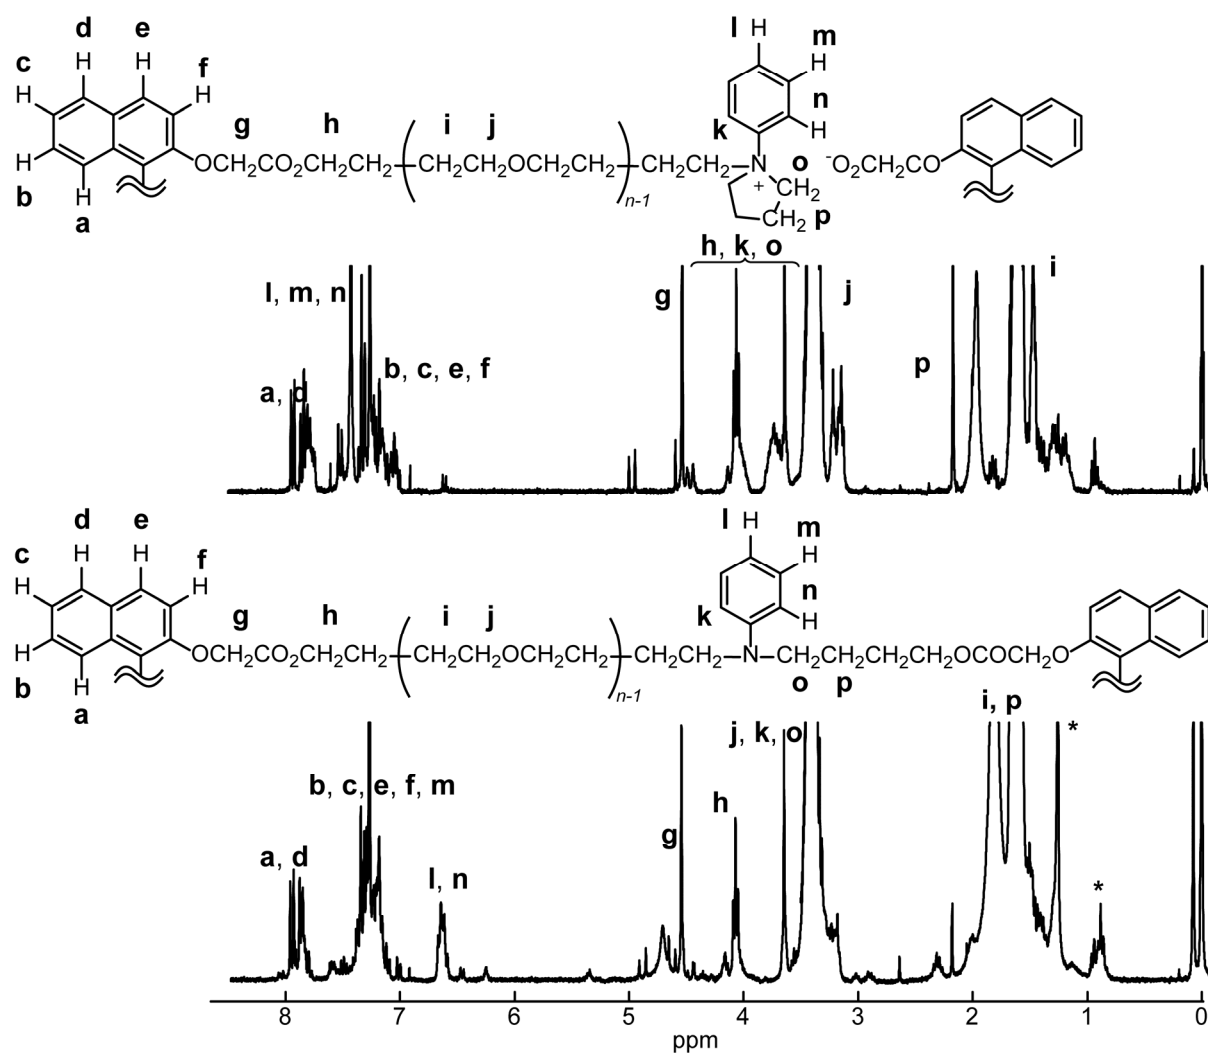

**Figure S5.** 300 MHz <sup>1</sup>H NMR spectra of (top) **3R/1s** and (bottom) **CR-s**. (CDCl<sub>3</sub>, 25 °C; the signal with \* is due to hexane in the mixture.)

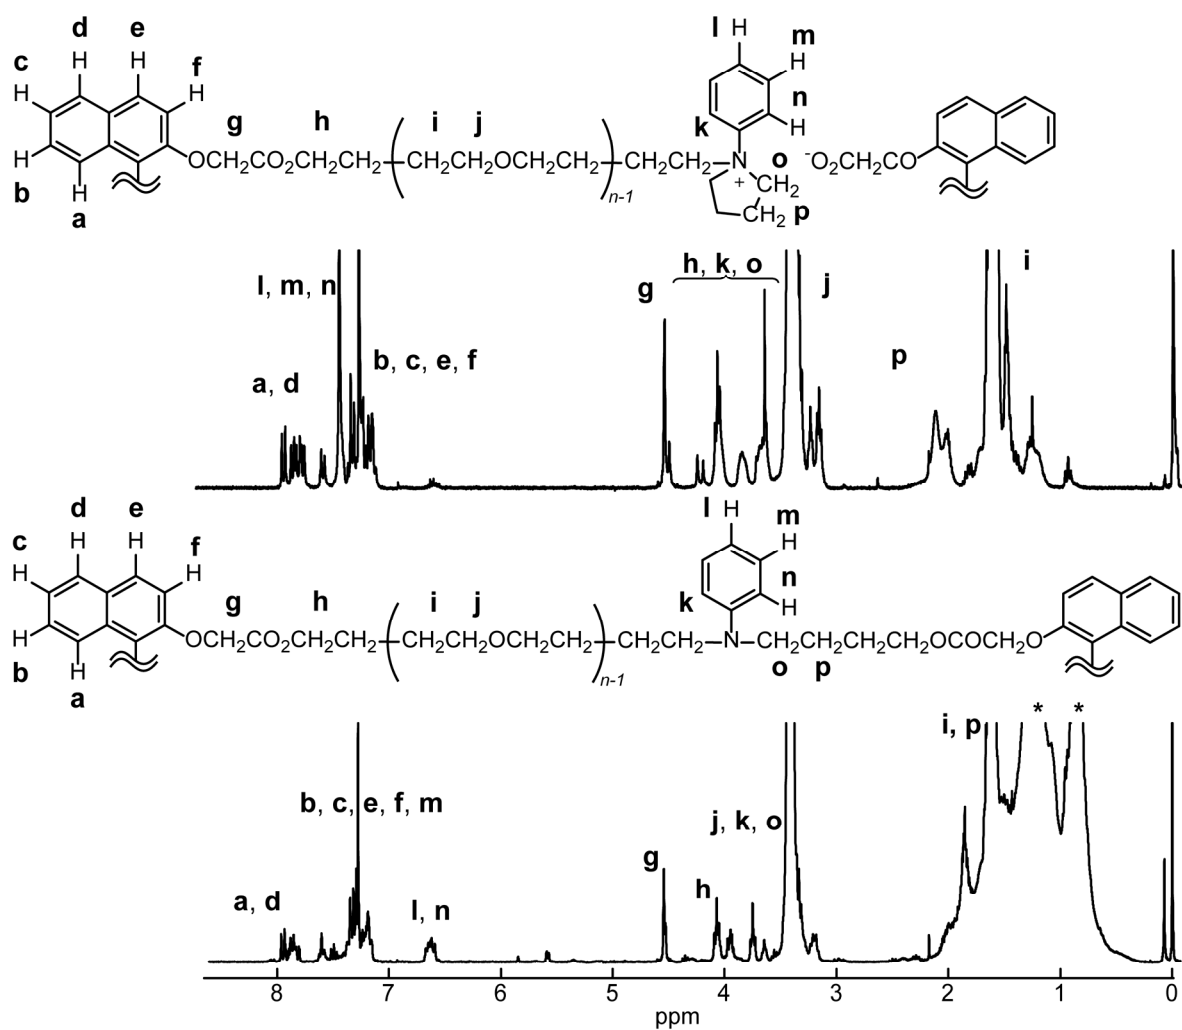

**Figure S6.** 300 MHz  $^1\text{H}$  NMR spectra of (top) **3R/1R/S** and (bottom) **CR-R/S**. ( $\text{CDCl}_3$ , 25  $^\circ\text{C}$ ; the signal with \* is due to hexane in the mixture.)

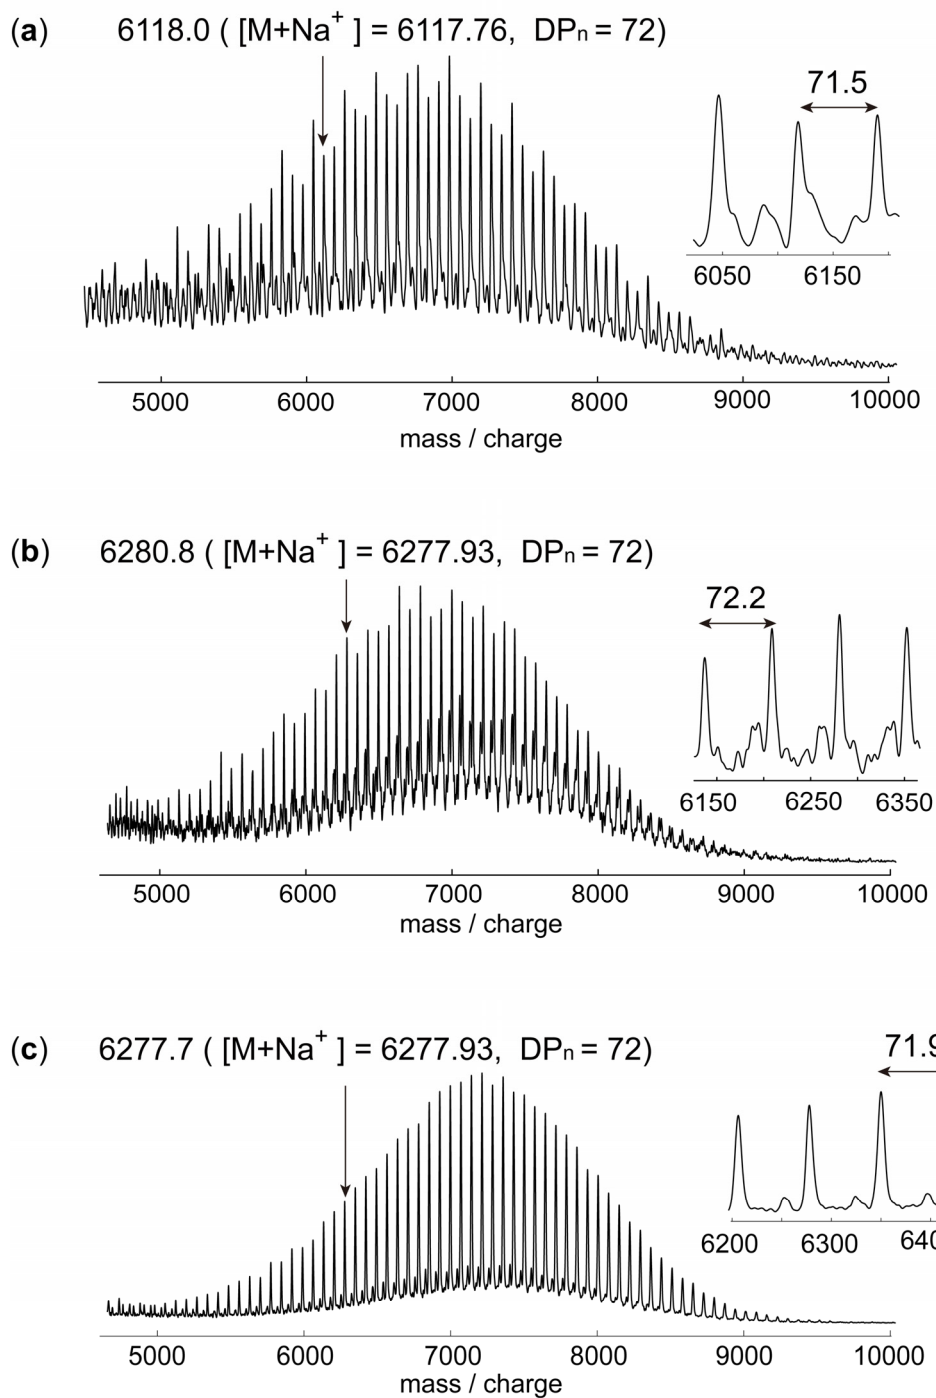

**Figure S7.** MALDI-TOF mass spectra of (top)  $C_{R-2}$ , (middle)  $C_{R-S}$ , and (bottom)  $C_{R-R/S}$ . (Linear mode, matrix: dithranol with sodium trifluoroacetate.  $DP_n$  denotes the number of monomer units in the product.)



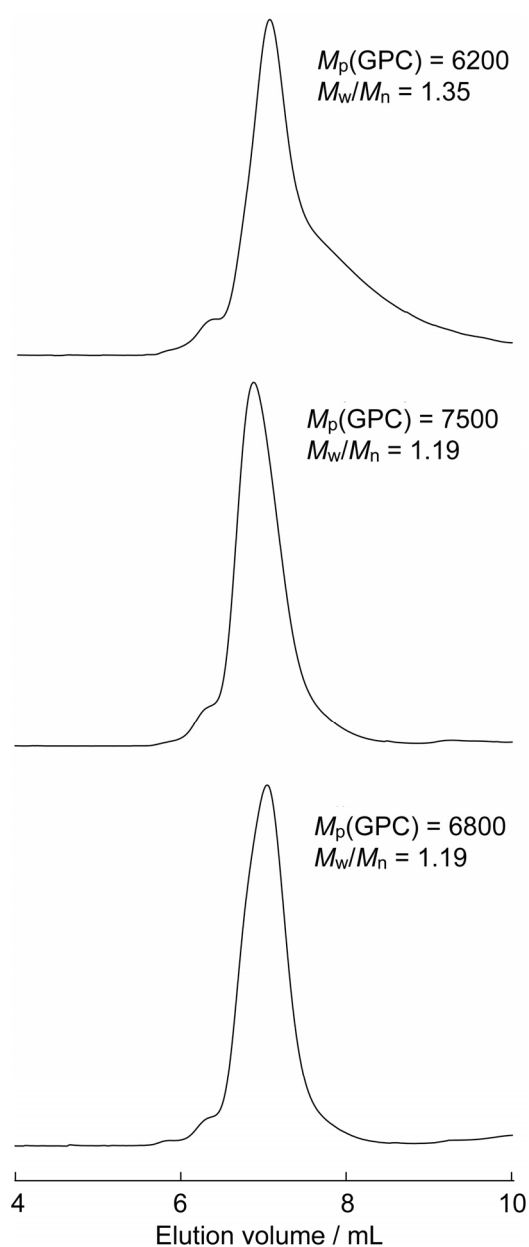

**Figure S8.** SEC traces of (top) C<sub>R-2</sub>, (middle) C<sub>R-S</sub>, and (bottom) C<sub>R-R/S</sub>. The observed minor shoulder peaks at the higher molecular weight direction in cyclic poly(THF)s are assignable to the products formed by the intermolecular chain-extension reaction. (THF as an eluent, 1.0 mL/min.)

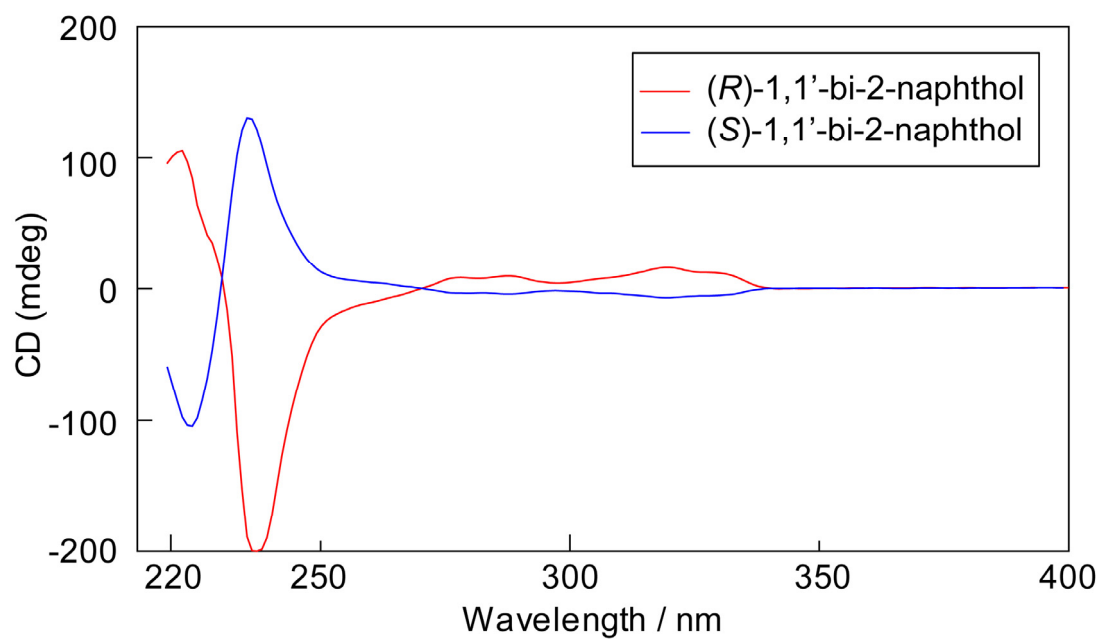

**Figure S9.** CD spectra of (*R*)-1,1'-bi-2-naphthol (in red) and (*S*)-1,1'-bi-2-naphthol (in blue). ( $1.0 \times 10^{-7}$  mol L<sup>-1</sup> in THF)

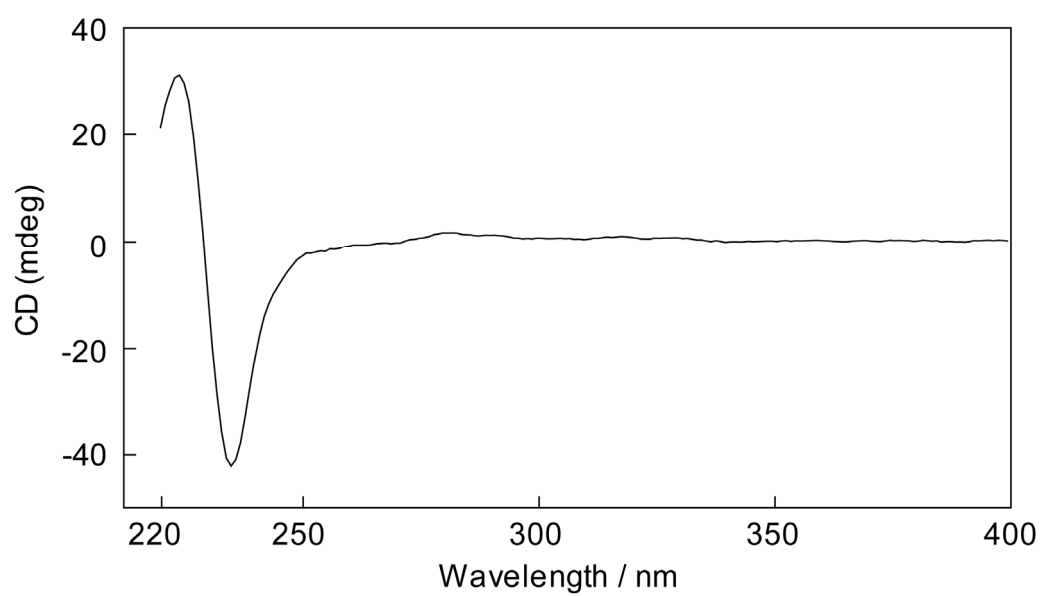

**Figure S10.** A CD spectrum of C<sub>R-1</sub>. ( $1.0 \times 10^{-7}$  mol L<sup>-1</sup> in THF)
